# Supplementary material
Source: PubMed Central journal article supplement (PMC5408457)
Supplement: NIHMS856715-supplement-Suppl_Table_1.pdf [file NIHMS856715-supplement-Suppl_Table_1.pdf]

**Supplementary Table 1 Compound list of Nuclear Receptor Ligand Library**

| Plate Location | Compound Name                        | Molecule Weight | Solvent | Concentration | Activity              |
|----------------|--------------------------------------|-----------------|---------|---------------|-----------------------|
| 1-B1           | 25-Hydroxyvitamin D3                 | 400.60          | DMSO    | 10 mM         | VDR agonist           |
| 1-B2           | Retinoic acid, all trans             | 300.40          | DMSO    | 10 mM         | RAR agonist           |
| 1-B3           | 9-cis Retinoic acid                  | 300.40          | DMSO    | 10 mM         | RXR agonist           |
| 1-B4           | 13-cis Retinoic acid                 | 300.40          | DMSO    | 10 mM         | RAR agonist           |
| 1-B5           | 4-Hydroxyphenylretina mide           | 391.50          | DMSO    | 10 mM         | RAR agonist           |
| 1-B6           | AM-580                               | 351.40          | DMSO    | 1 mM          | RAR $\alpha$ agonist  |
| 1-B7           | TTNPB                                | 348.50          | DMSO    | 1 mM          | RAR agonist           |
| 1-B8           | Methoprene acid                      | 268.40          | DMSO    | 10 mM         | RXR agonist           |
| 1-B9           | WY-14643                             | 323.80          | DMSO    | 10 mM         | PPAR agonist          |
| 1-B10          | Ciglitazone                          | 333.40          | DMSO    | 10 mM         | PPAR $\gamma$ agonist |
| 1-B11          | Tetradecylthioacetic acid            | 288.50          | DMSO    | 10 mM         | PPAR agonist          |
| 1-B12          | 5,8,11,14-Eicosatetrayno ic acid     | 296.40          | DMSO    | 10 mM         | PPAR $\alpha$ agonist |
| 1-C1           | 6-Formylindolo [3,2-B] carbazole     | 284.30          | DMSO    | 10 mM         | AHR agonist           |
| 1-C2           | Diindolylmethane                     | 246.30          | DMSO    | 10 mM         | AHR agonist           |
| 1-C3           | Acetyl-S-farnesyl-L-cyst eine        | 367.50          | DMSO    | 10 mM         | Farnesoid             |
| 1-C4           | S-Farnesyl-L-cysteine methyl ester   | 339.50          | DMSO    | 10 mM         | Farnesoid             |
| 1-C5           | N-Acetyl-S-geranygeran yl-L-cysteine | 435.70          | DMSO    | 1 mM          | Farnesoid             |

|       |                                     |        |      |       |                          |
|-------|-------------------------------------|--------|------|-------|--------------------------|
| 1-C6  | Acetyl-geranyl-cysteine             | 299.40 | DMSO | 10 mM | Farnesoid                |
| 1-C7  | Farnesylthioacetic acid             | 296.50 | DMSO | 1 mM  | Farnesoid                |
| 1-C8  | Bezafibrate                         | 361.80 | DMSO | 10 mM | PPAR $\alpha$ agonist    |
| 1-C9  | LY171883                            | 318.40 | DMSO | 10 mM | PPAR $\gamma$ agonist    |
| 1-C10 | 15-Deoxy-D12,14-prostaglandin J2    | 316.40 | DMSO | 1 mM  | PPAR $\gamma$ agonist    |
| 1-C11 | Troglitazone                        | 441.50 | DMSO | 10 mM | PPAR $\gamma$ agonist    |
| 1-C12 | CITCO                               | 436.70 | DMSO | 10 mM | CAR agonist              |
| 1-D1  | Paxilline                           | 435.60 | DMSO | 10 mM | LXR agonist              |
| 1-D2  | 24(S)-Hydroxycholesterol            | 402.70 | DMSO | 10 mM | LXR agonist              |
| 1-D3  | 24(S),25-Epoxycholesterol           | 400.60 | DMSO | 10 mM | LXR agonist              |
| 1-D4  | Pregnenolone-16(alpha)-carbonitrile | 341.50 | DMSO | 10 mM | PXR/SXR agonist          |
| 1-D5  | Blank                               |        |      |       |                          |
| 1-D6  | Clofibric acid                      | 214.60 | DMSO | 10 mM | PPAR $\alpha$ agonist    |
| 1-D7  | BADGE                               | 340.40 | DMSO | 10 mM | PPAR $\gamma$ antagonist |
| 1-D8  | GW9662                              | 276.70 | DMSO | 10 mM | PPAR $\gamma$ antagonist |
| 1-D9  | Gemfibrozil                         | 250.30 | DMSO | 10 mM | PPAR $\alpha$ agonist    |
| 1-D10 | GW7647                              | 502.80 | DMSO | 10 mM | PPAR $\alpha$ agonist    |
| 1-D11 | 3,5-Diiodo-L-thyronine              | 525.10 | DMSO | 10 mM | THR agonist              |
| 1-D12 | 3,5-Diiodo-L-tyrosine               | 433.00 | DMSO | 10 mM | THR congener             |
| 1-E1  | Blank                               |        |      |       |                          |
| 1-E2  | 13-cis-Retinol                      | 286.50 | DMSO | 10 mM | Retinoid                 |
| 1-E3  | Retinyl acetate                     | 328.50 | DMSO | 10 mM | Retinoid                 |

|       |                                          |        |      |       |                        |
|-------|------------------------------------------|--------|------|-------|------------------------|
| 1-E4  | 3,5-Diiodo-4-hydroxyphenylpropionic acid | 418.00 | DMSO | 10 mM | THR agonist            |
| 1-E5  | Cholic acid                              | 408.60 | DMSO | 10 mM | FXR agonist            |
| 1-E6  | Deoxycholic acid                         | 392.60 | DMSO | 10 mM | FXR agonist            |
| 1-E7  | Chenodeoxycholic acid                    | 392.60 | DMSO | 10 mM | FXR agonist            |
| 1-E8  | Glycocholic acid                         | 465.60 | DMSO | 10 mM | Cholesterol metabolite |
| 1-E9  | Glycodeoxycholic acid                    | 449.60 | DMSO | 10 mM | Cholesterol metabolite |
| 1-E10 | Taurocholic acid                         | 515.70 | DMSO | 10 mM | Cholesterol metabolite |
| 1-E11 | Taurodeoxycholic acid                    | 499.70 | DMSO | 10 mM | Cholesterol metabolite |
| 1-E12 | Rifampicin                               | 822.90 | DMSO | 10 mM | PXR agonist            |
| 1-F1  | Dexamethasone                            | 392.50 | DMSO | 10 mM | GR agonist             |
| 1-F2  | Lithocholic acid                         | 376.60 | DMSO | 10 mM | Cholesterol metabolite |
| 1-F3  | 5 $\beta$ -Pregnan-3,20-dione            | 316.50 | DMSO | 10 mM | PXR agonist            |
| 1-F4  | Adapalene                                | 412.50 | DMSO | 10 mM | Retinoic acid analog   |
| 1-F5  | Farnesol                                 | 222.40 | DMSO | 10 mM | Farnesoid              |
| 1-F6  | 3 $\alpha$ , 5 $\alpha$ -Androstenol     | 274.40 | DMSO | 10 mM | CAR inverse agonist    |
| 1-F7  | 3 $\alpha$ , 5 $\alpha$ -Androstanol     | 276.50 | DMSO | 10 mM | CAR inverse agonist    |
| 1-F8  | Z-Guggulsterone                          | 312.40 | DMSO | 10 mM | FXR antagonist         |
| 1-F9  | TCPOBOP                                  | 402.10 | DMSO | 10 mM | CAR agonist            |
| 1-F10 | N-Oleoylethanolamide                     | 325.50 | DMSO | 10 mM | PPAR $\alpha$ agonist  |
| 1-F11 | GW4064                                   | 542.80 | DMSO | 10 mM | FXR agonist            |
| 1-F12 | Geranylgeraniol                          | 290.50 | DMSO | 10 mM | Farnesoid              |
| 1-G1  | 6 $\alpha$ -Fluorotestosterone           | 306.40 | DMSO | 10 mM | TR agonist             |
| 1-G2  | Tamoxifen                                | 371.50 | DMSO | 10 mM | ER antagonist          |

|       |                                             |        |      |       |                        |
|-------|---------------------------------------------|--------|------|-------|------------------------|
| 1-G3  | Mifepristone                                | 429.60 | DMSO | 10 mM | PR antagonist          |
| 1-G4  | Estrone                                     | 270.40 | DMSO | 10 mM | ER agonist             |
| 1-G5  | 13(S)-Hydroxy-9Z,11E-octadecadienoic acid   | 296.40 | DMSO | 10 mM | PPAR $\gamma$ agonist  |
| 1-G6  | Cortisone                                   | 360.40 | DMSO | 10 mM | GR agonist             |
| 1-G7  | Progesterone                                | 314.50 | DMSO | 10 mM | PR agonist             |
| 1-G8  | 17 $\beta$ -Estradiol                       | 272.40 | DMSO | 10 mM | ER agonist             |
| 1-G9  | Pregnenolone                                | 316.50 | DMSO | 10 mM | Progesterone precursor |
| 1-G10 | Androstenedione                             | 286.40 | DMSO | 10 mM | Testosterone precursor |
| 1-G11 | 1 $\alpha$ ,25-Dihydroxyvitamin D3          | 416.60 | DMSO | 10 mM | VDR agonist            |
| 1-G12 | Docosa-4Z,7Z,10Z,13Z,16Z,19Z-hexaenoic acid | 328.50 | DMSO | 10 mM | RXR / FXR agonist      |
| 1-H1  | 3-Methylcholanthrene                        | 268.40 | DMSO | 10 mM | AHR agonist            |
| 1-H2  | Acitretin                                   | 326.40 | DMSO | 10 mM | Retinoid               |
| 1-H3  | Pioglitazone                                | 356.40 | DMSO | 10 mM | PPAR $\gamma$ agonist  |
| 1-H4  | 4-Hydroxyretinoic acid                      | 316.40 | DMSO | 10 mM | Retinoid metabolite    |
