# Supplementary material
Source: PubMed Central journal article supplement (PMC5408457)
Supplement: NIHMS856715-supplement-Suppl_Table_2_and_3.pdf [file NIHMS856715-supplement-Suppl_Table_2_and_3.pdf]

**Supplementary Table 2 Determination of SRC frequency by limiting dilution assay in NSG mice (Experiment 1, p=0.00368)**

| <i>Culture condition</i> | <i>Cell number transplanted</i> | <i>Number of mice with &gt;10% human cell chimerism/total number of mice</i> | <i>SRC frequency</i> | <i>95% confidence interval</i> | <i>Number of SRC in <math>1 \times 10^6</math> CD34<sup>+</sup> cells</i> |
|--------------------------|---------------------------------|------------------------------------------------------------------------------|----------------------|--------------------------------|---------------------------------------------------------------------------|
| Vehicle                  | 500                             | 1/5                                                                          | 1/4162               | 1/9507 to 1/1822               | 240                                                                       |
|                          | 2500                            | 3/5                                                                          |                      |                                |                                                                           |
|                          | 10000                           | 4/5                                                                          |                      |                                |                                                                           |
| Flonase                  | 500                             | 2/4                                                                          | 1/611                | 1/1732 to 1/216                | 1637                                                                      |
|                          | 2500                            | 5/5                                                                          |                      |                                |                                                                           |
|                          | 10000                           | 5/5                                                                          |                      |                                |                                                                           |

**Supplementary Table 3 Determination of SRC frequency by limiting dilution assay in NSG mice (Experiment 2, p=0.0235)**

| <i>Culture condition</i> | <i>Cell number transplanted</i> | <i>Number of mice with &gt;10% human cell chimerism/total number of mice</i> | <i>SRC frequency</i> | <i>95% confidence interval</i> | <i>Number of SRC in <math>1 \times 10^6</math> CD34<sup>+</sup> cells</i> |
|--------------------------|---------------------------------|------------------------------------------------------------------------------|----------------------|--------------------------------|---------------------------------------------------------------------------|
| Vehicle                  | 500                             | 0/3                                                                          | 1/7344               | 1/20604 to 1/2618              | 136                                                                       |
|                          | 2500                            | 1/3                                                                          |                      |                                |                                                                           |
|                          | 10000                           | 3/4                                                                          |                      |                                |                                                                           |
| Flonase                  | 500                             | 1/4                                                                          | 1/1576               | 1/3903 to 1/637                | 635                                                                       |
|                          | 2500                            | 4/5                                                                          |                      |                                |                                                                           |
|                          | 10000                           | 5/5                                                                          |                      |                                |                                                                           |
