# Supplementary material
Source: PubMed Central journal article supplement (PMC5408457)

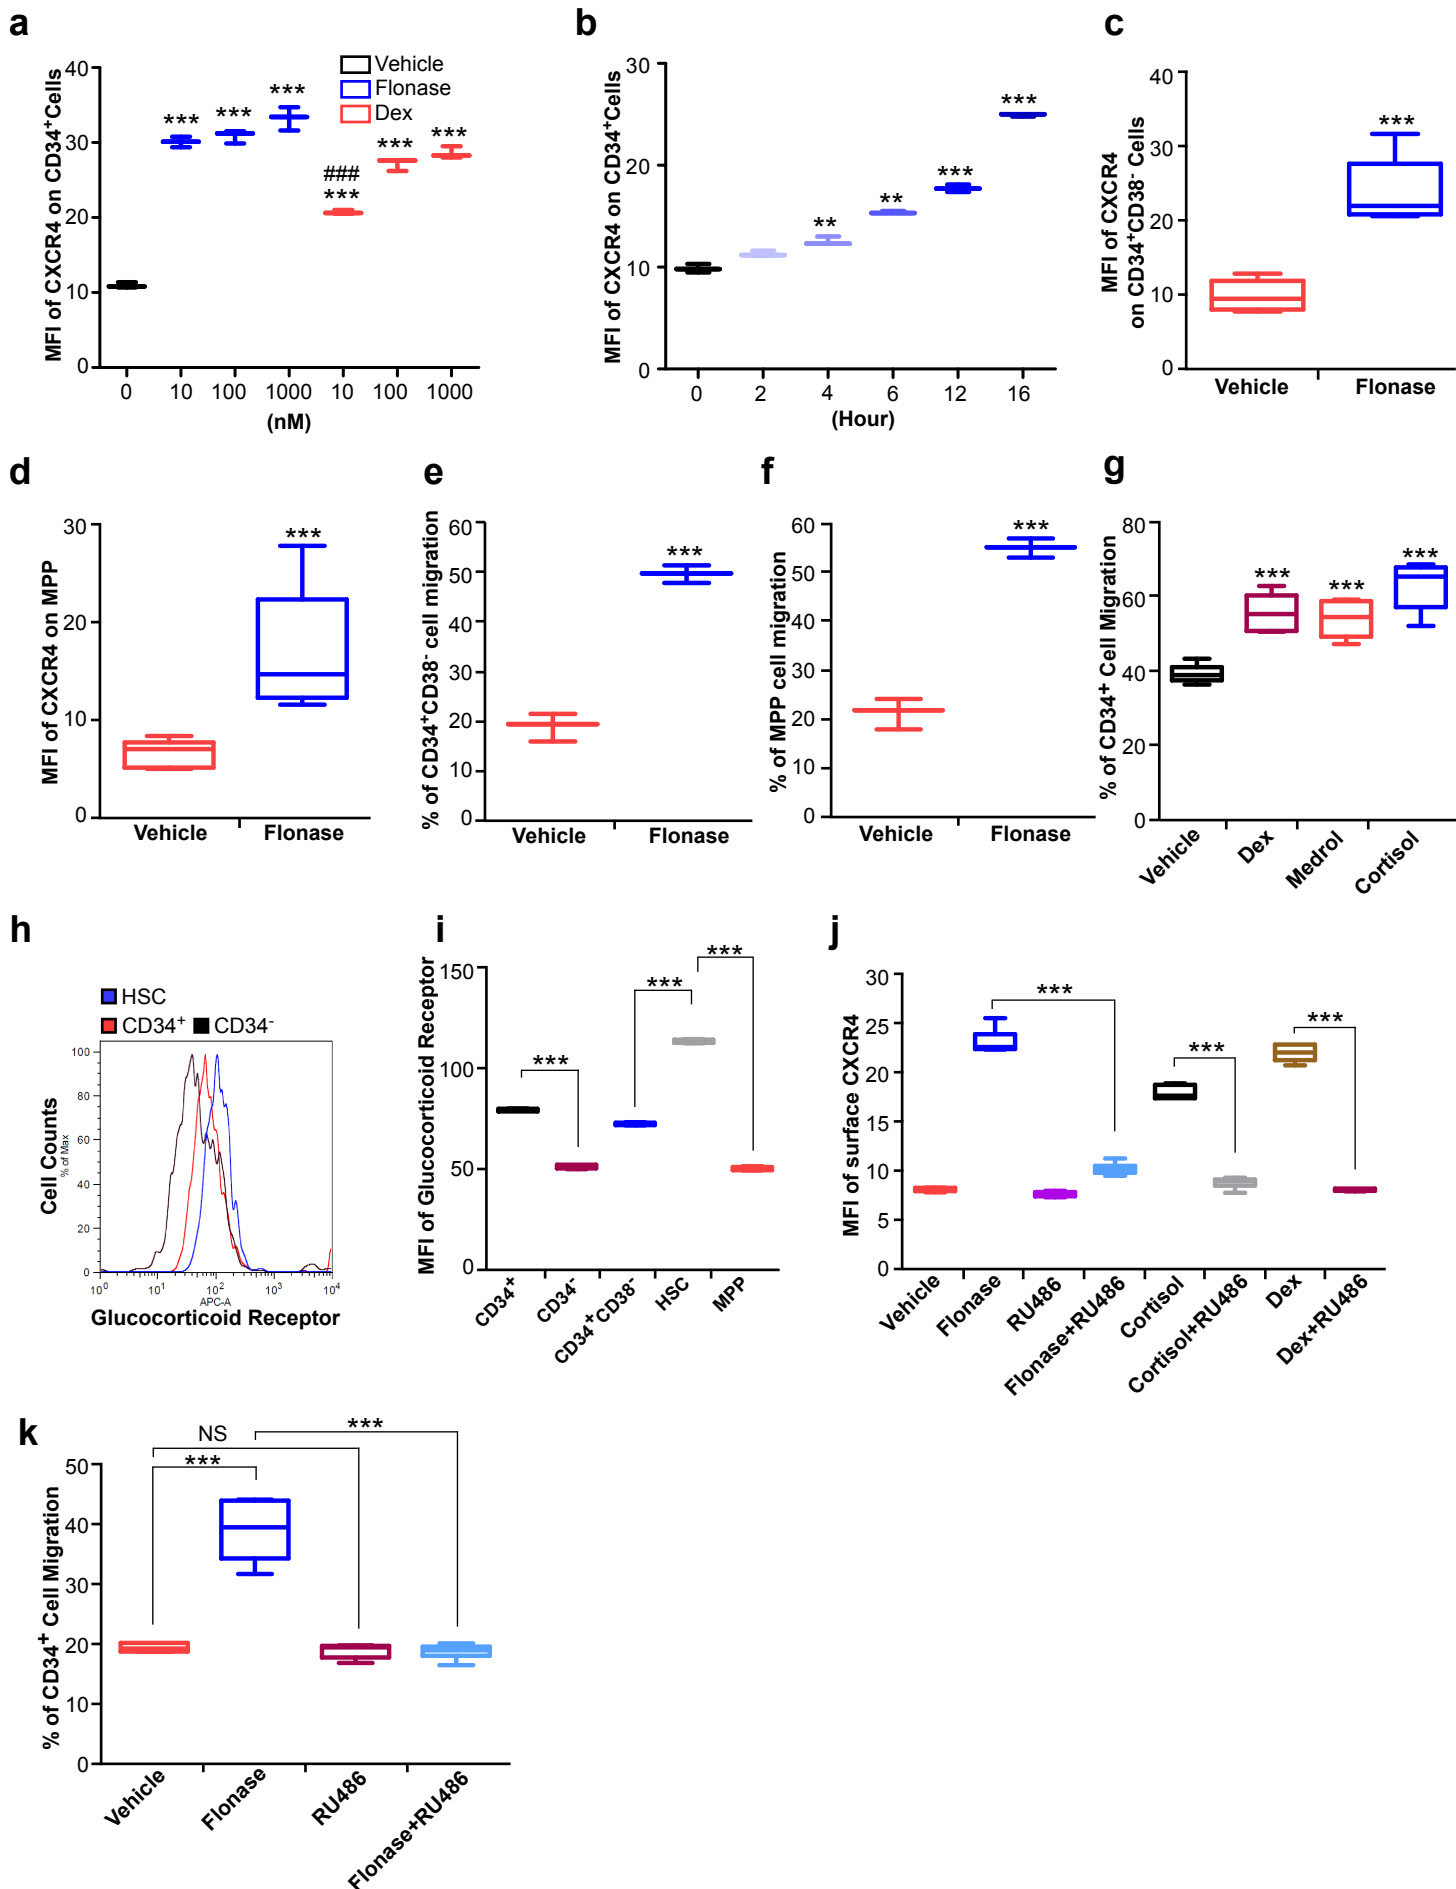

Supplementary Figure 1

Supplement: NIHMS856715-supplement-Suppl_Fig_1.pdf [file NIHMS856715-supplement-Suppl_Fig_1.pdf]

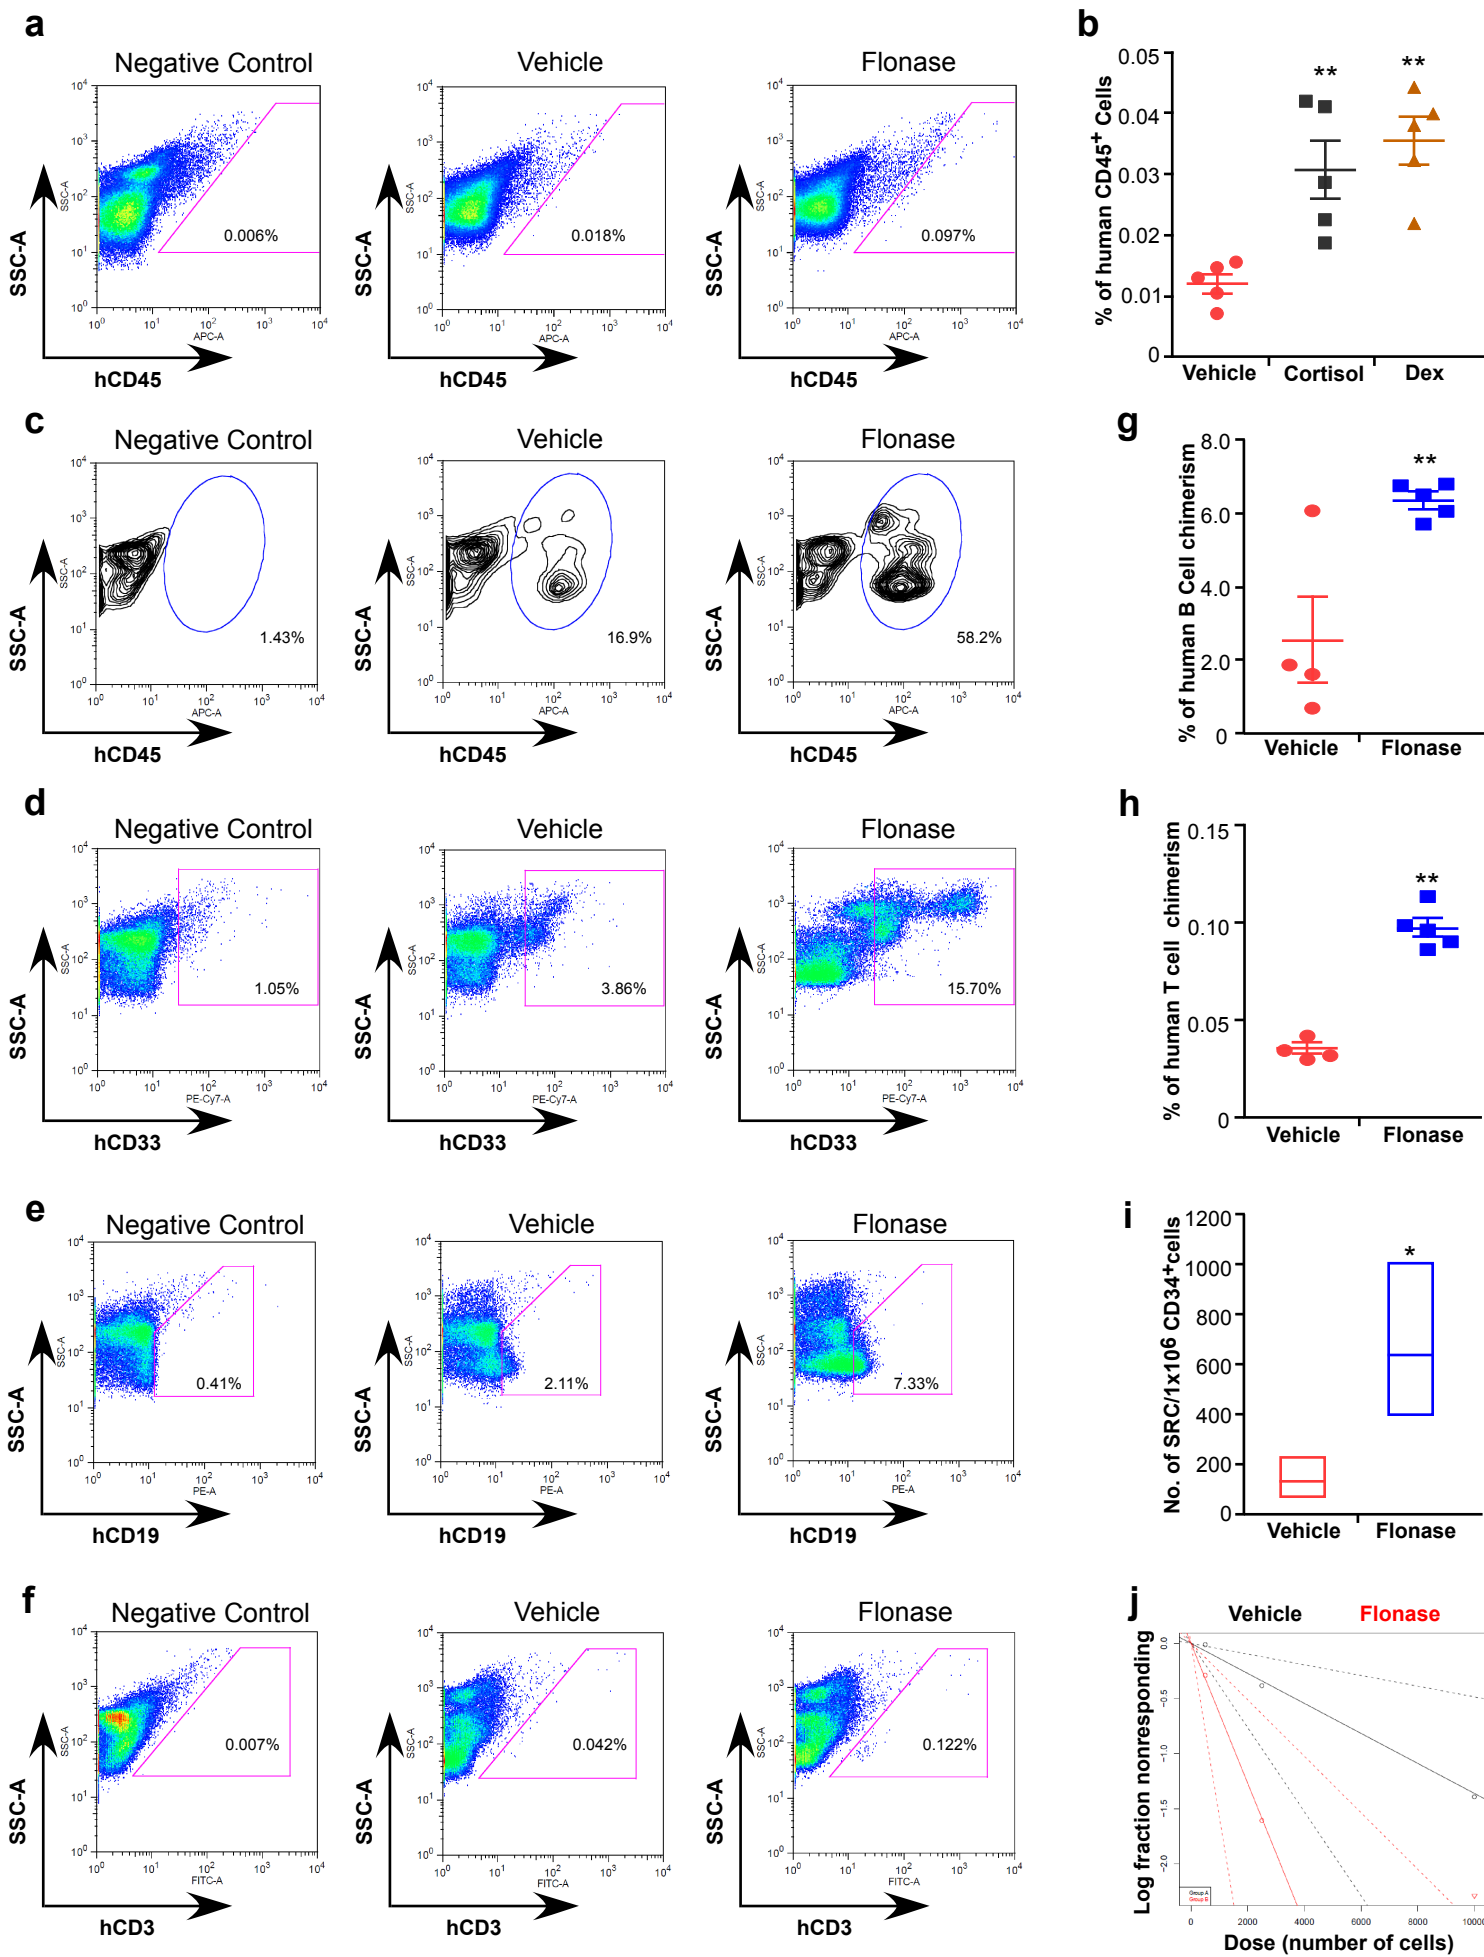

Supplementary Figure 2

Supplement: NIHMS856715-supplement-Suppl_Fig_2.pdf [file NIHMS856715-supplement-Suppl_Fig_2.pdf]

**a** Full size images for Fig 2b

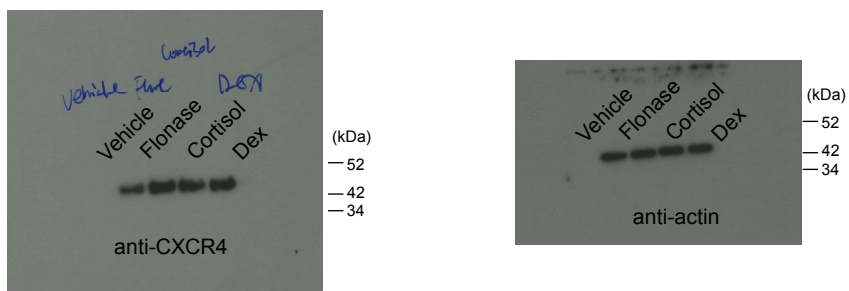

**b** Full size images for Fig 2h

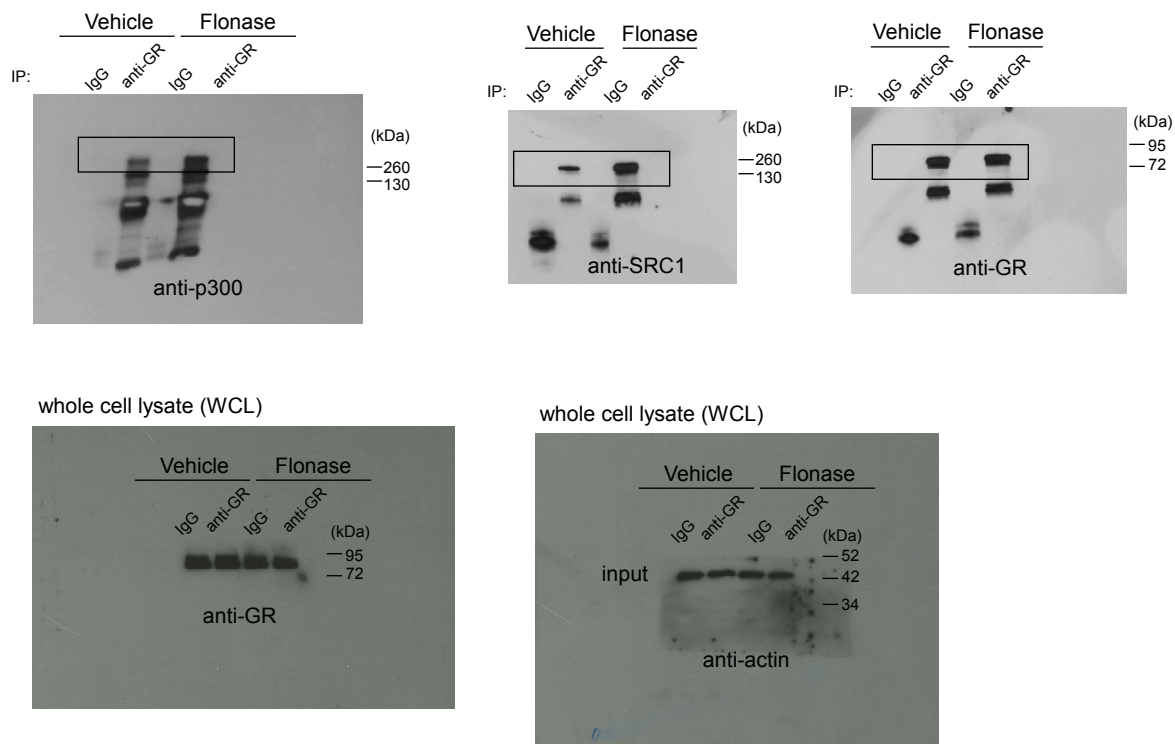

Supplement: NIHMS856715-supplement-Suppl_Fig_4.pdf [file NIHMS856715-supplement-Suppl_Fig_4.pdf]

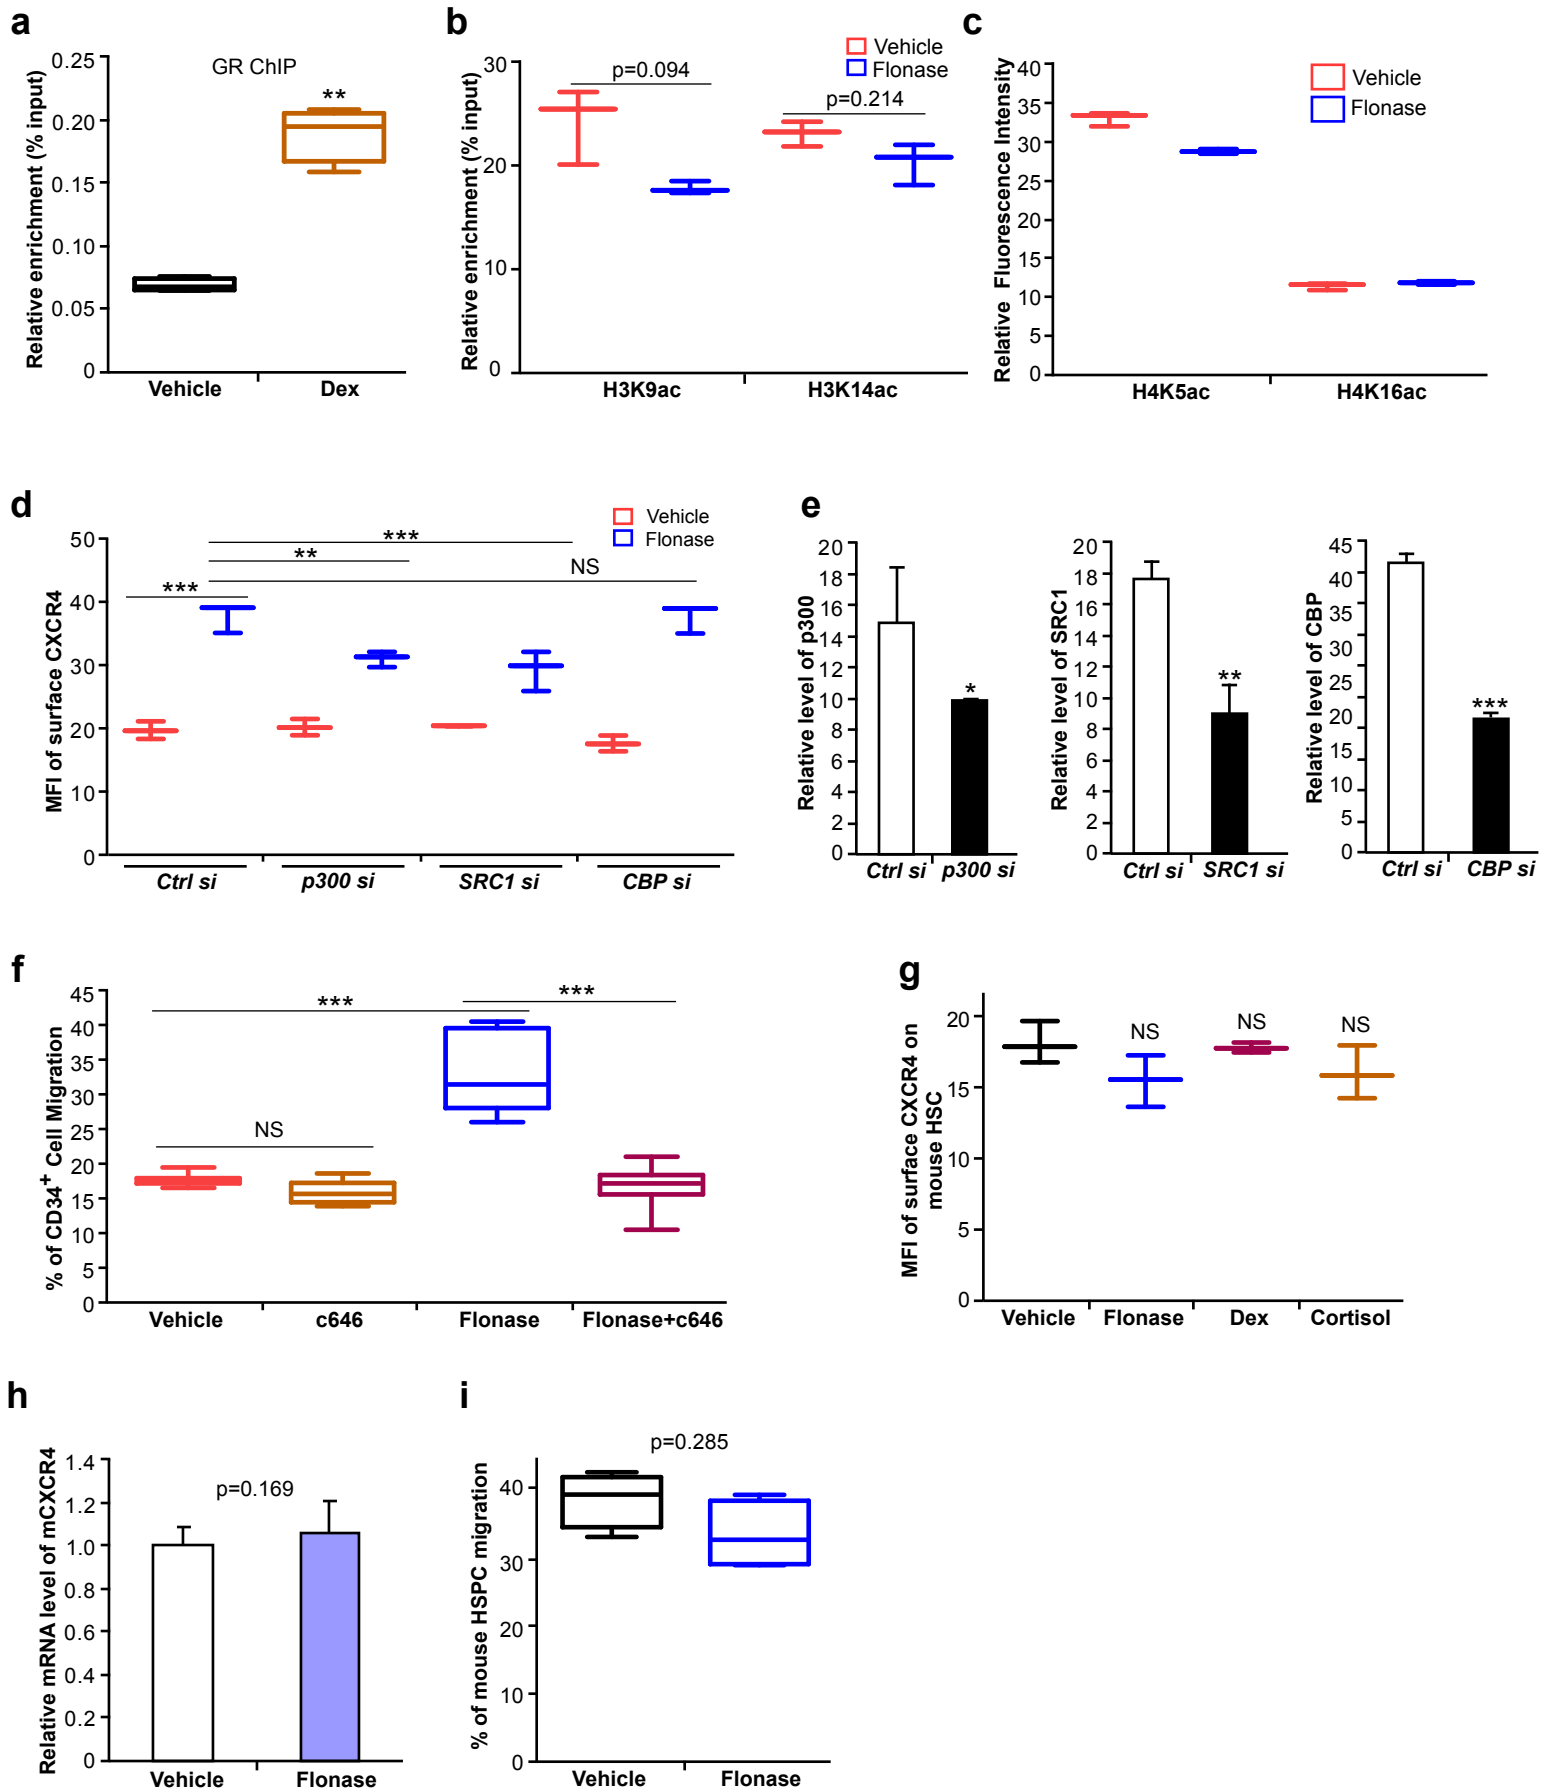

Supplementary Figure 3

Supplement: NIHMS856715-supplement-Supple_Fig_3.pdf [file NIHMS856715-supplement-Supple_Fig_3.pdf]
